# Supplementary material
Source: PubMed Central journal article supplement (PMC2857981)
Supplement: NIHMS170147-supplement-SuppFig.pdf [file NIHMS170147-supplement-SuppFig.pdf]

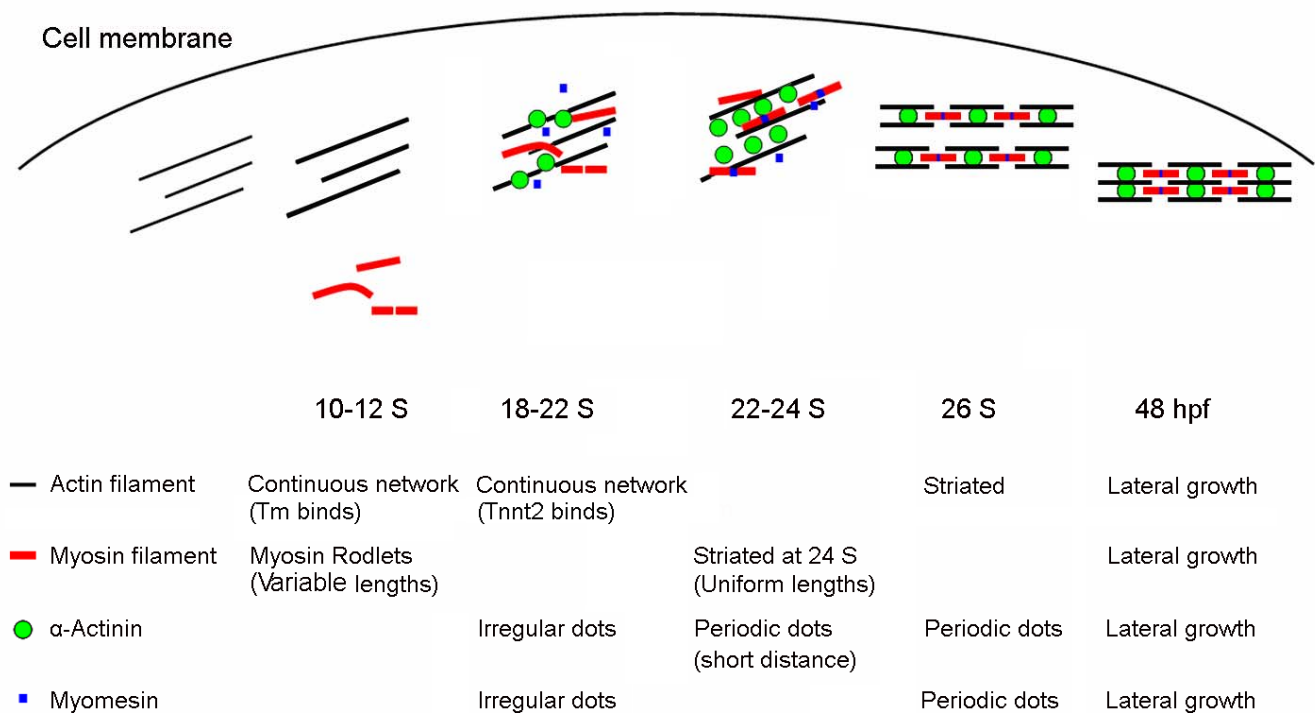

**Supplemental Fig. S1. Summary of myofibrillogenesis in the zebrafish heart.**

At least five different stages can be resolved during heart development: (1) independent assembly of thin and thick filaments; (2) appearance of irregular  $\alpha$ -actinin and myomesin dots; (3) striation of  $\alpha$ -actinin separated by a shorter distance and integration of thick filaments into the thin filament network; (4) expansion of the Z-disc, M-line, and thin filaments; and (5) lateral growth to form a mature sarcomere.

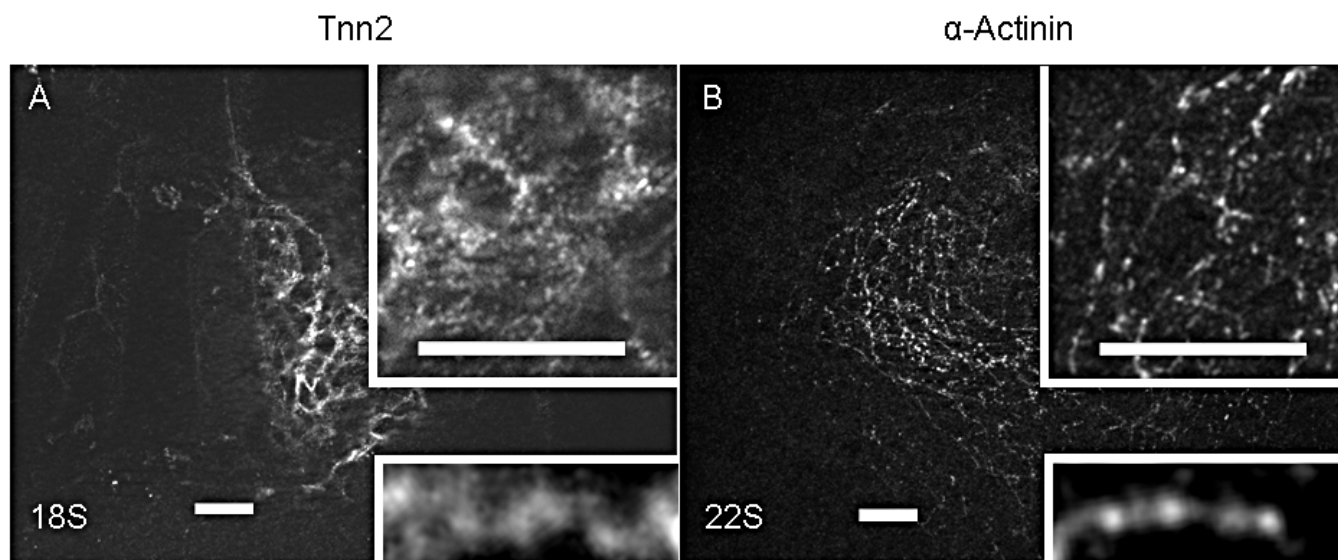

**Supplemental Fig. S2.** Immunostaining for *tnnt2* (A) and  $\alpha$ -actinin (B) in the WT heart at early stages. At 18 S, *tnnt2* appears as dotted pattern that associates with the thin filament network in perimembrane region. At 22 S,  $\alpha$ -actinin dots start to be periodic, but show a shorter distance between two neighboring  $\alpha$ -actinin dots than at 26 S. Insets are of the same image of higher magnification to reveal networks (at top), and a myofibril (at bottom). Scale bar = 20  $\mu$ m.

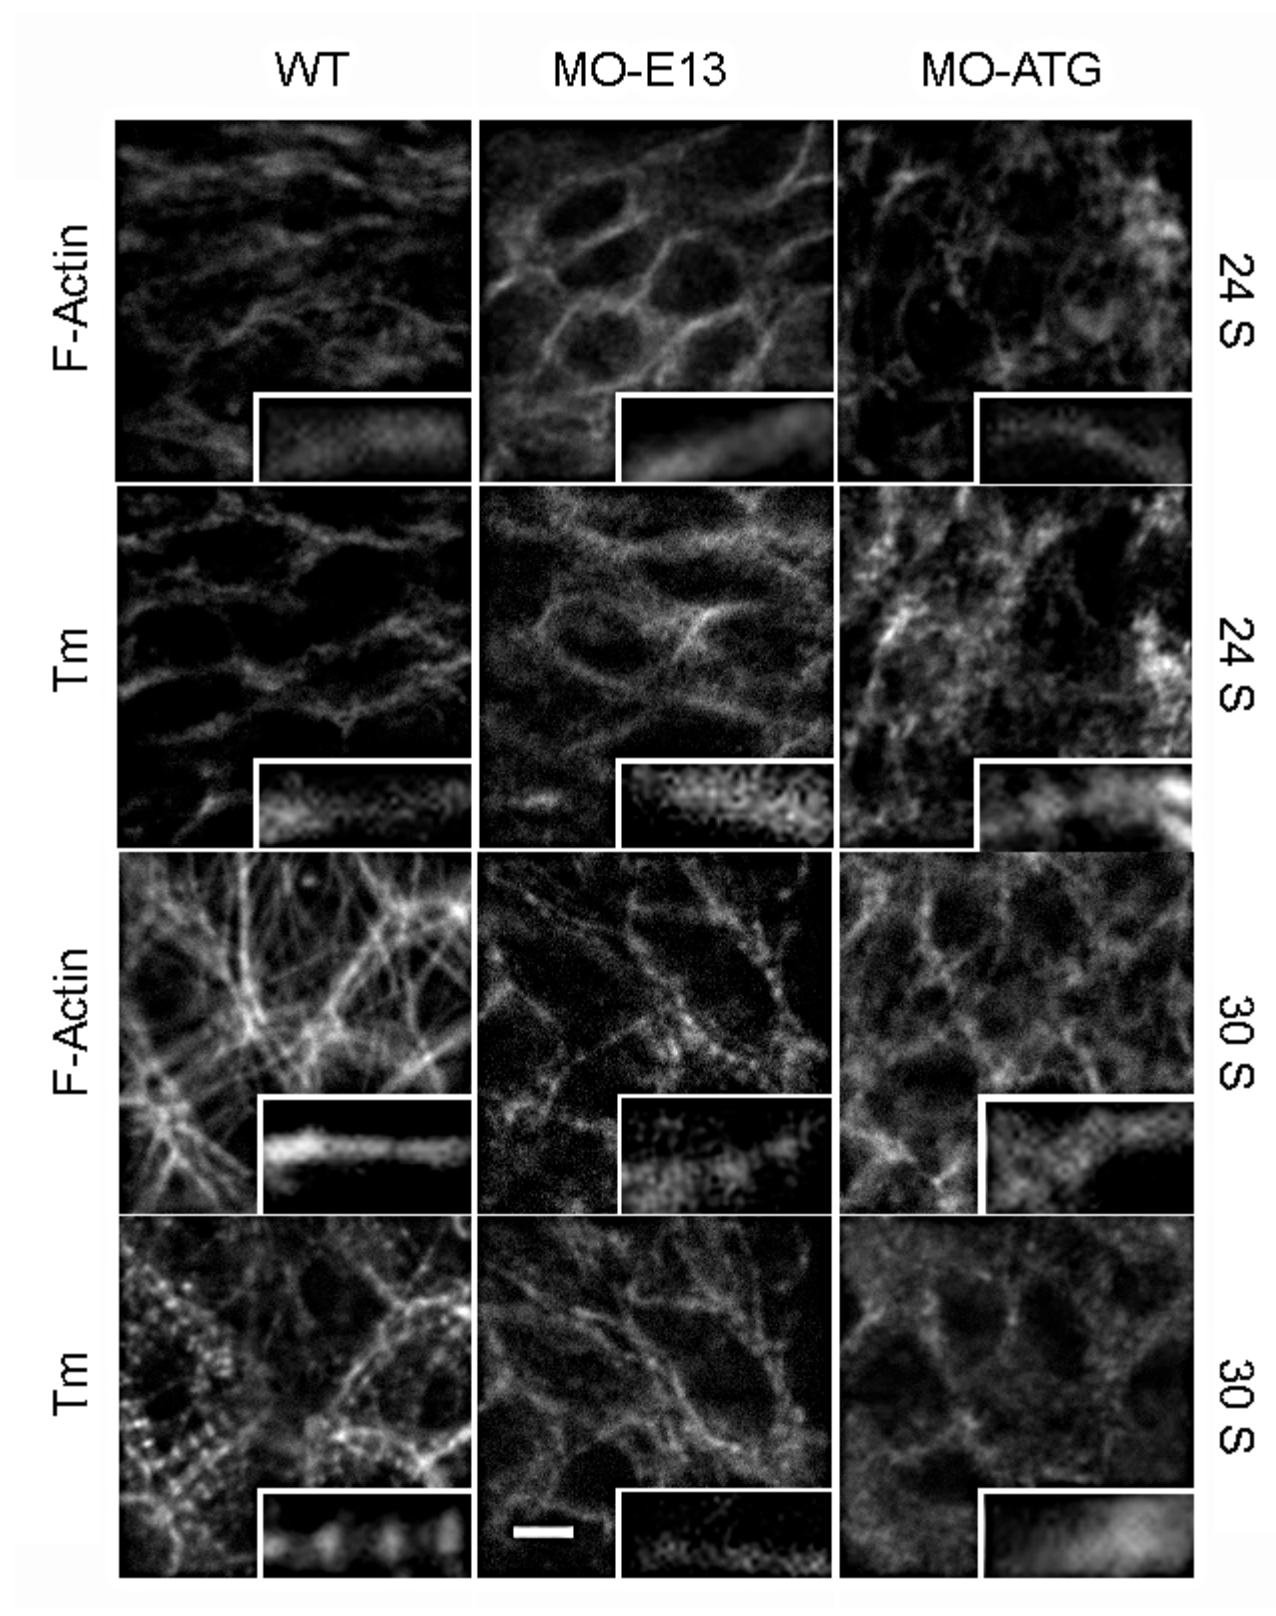

Supplemental Fig. 3

**Supplemental Fig. S3.** Thin filament assembly in morphants at an early stage revealed by immunostaining for F-actin and Tm. Assembly of continuous thin filaments was not affected in either MO-ATG or MO-E13 morphants at 24 S. Thin filaments remained as continuous filaments at 30 S in MO-ATG morphants while both F-actin and Tm exhibit a striated pattern in the WT control and MO-E13 morphants. Scale bar = 5  $\mu$ m.

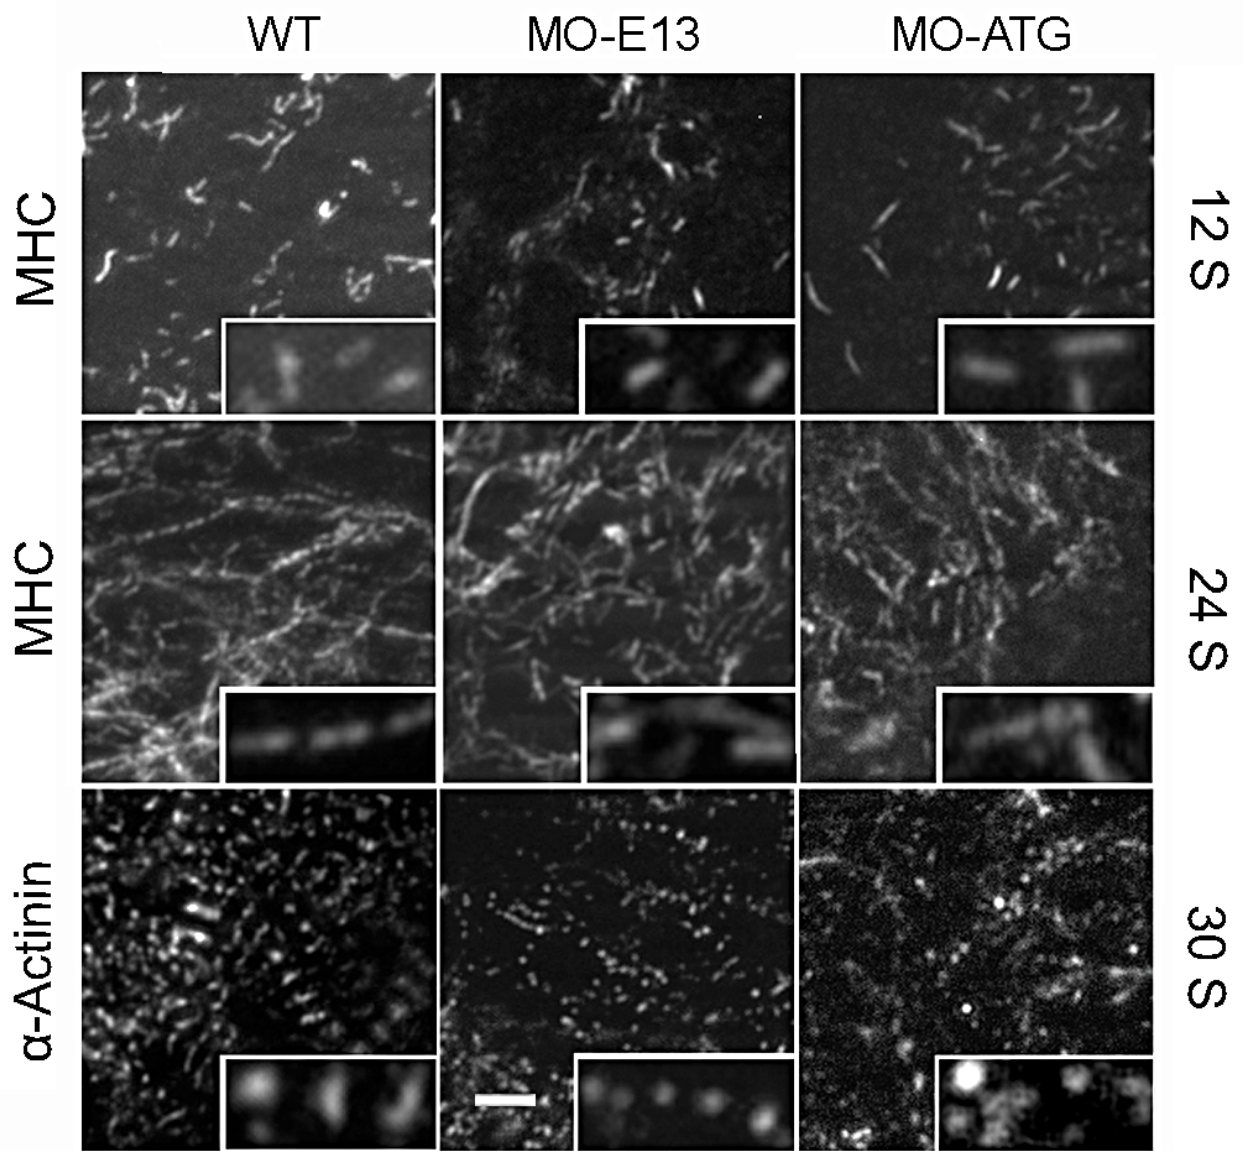

**Supplemental Fig. S4.** Thick filament and  $\alpha$ -actinin assembly in morphants at early stages revealed by immunostaining for MHC and  $\alpha$ -actinin, respectively. Myosin rodlets with variable lengths are assembled normally in both morphants at 12 S. However, they fail to be striated and do not integrate into the thin filament network at 24 S, as does the WT control. Irregular  $\alpha$ -actinin dots were detected in MO-ATG morphants at 30 S, while periodic dots can be detected in both the WT control and MO-E13 morphants. Scale bar = 5  $\mu$ m.

| <b>Zebrafish *</b> | <b>Exon Length (bp)</b> | <b>Ensembl Database Number</b> | <b>Human #</b> | <b>Exon Length (bp)</b> | <b>Comments</b>         |
|--------------------|-------------------------|--------------------------------|----------------|-------------------------|-------------------------|
|                    |                         |                                | Exon 1         | 55                      |                         |
| Exon 1             | 32                      | ENSDARE00000738634             | Exon 2         | 55                      | Translation start codon |
| Exon 2             | 11                      | ENSDARE00000738453             |                |                         |                         |
| Exon 3             | 7                       | ENSDARE00000738464             |                |                         |                         |
| Exon 4             | 54                      | ENSDARE00000738613             |                |                         |                         |
|                    |                         |                                | Exon 3         | 11                      |                         |
|                    |                         |                                | Exon 4'        | 15                      |                         |
|                    |                         |                                | Exon 5'        | 30                      |                         |
| Exon 5             | 60                      | ENSDARE00000738452             | Exon 6         | 66                      |                         |
| Exon 6             | 30                      | ENSDARE00000738595             | Exon 7         | 36                      |                         |
| Exon 7             | 25                      | ENSDARE00000595106             |                |                         |                         |
|                    |                         |                                | Exon 8         | 34                      |                         |
| Exon 8             | 64                      | ENSDARE00000401007             | Exon 9         | 61                      |                         |
| Exon 9             | 117                     | ENSDARE00000008500             | Exon 10        | 117                     |                         |
| Exon 10            | 78                      | ENSDARE00000082232             | Exon 11        | 78                      |                         |
| Exon 11            | 108                     | ENSDARE00000401005             | Exon 12        | 111                     |                         |
|                    |                         |                                | Exon 13a'      | 9                       |                         |
|                    |                         |                                | Exon 13b'      | 6                       |                         |
| Exon 12            | 110                     | ENSDARE00000034878             | Exon 14        | 110                     |                         |
| Exon 13            | 90                      | ENSDARE00000738495             | Exon 15        | 91                      |                         |
| Exon 14            | 41                      | ENSDARE00000738479             | Exon 16        | 41                      |                         |
| Exon 15            | 20                      | ENSDARE00000738442             |                |                         |                         |
| Exon 16            | 23                      | ENSDARE00000738440             |                |                         |                         |
| Exon 17            | 31                      | ENSDARE00000738450             |                |                         |                         |
| Exon 18            | 183                     | ENSDARE00000738459             |                |                         | Translation stop codon  |
|                    |                         |                                | Exon 17        | 242                     |                         |

\* Zebrafish exons were confirmed experimentally by our data, except exon 3, 16, and 17, which were predicted in the Ensembl database.

# Human exons were named according to Genbank sequences: NM\_000364, NM\_001001430, NM\_001001431, NM\_001001432

' Alternatively spliced in human

Supplemental Table 1
